# Supplementary material for: Charge carriers in alkaline direct oxidation fuel cells
Source: Royal Society of Chemistry journal article supplement (doi:10.1039/c2ee21734a), 2012-01-01
Supplement: c2ee21734a.pdf [file c2ee21734a.pdf]

## Supplementary Information

### 1. Ethanol oxidation reaction in alkaline media:

On the anode, ethanol, being mixed with an alkali, is oxidized to form acetic acid (CH<sub>3</sub>COOH) according to:

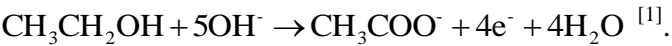

### 2. The chemical structures of the three membranes:

| Membrane type    | Anion-exchange membrane (AEM)                                                     | Cation-exchange membrane (CEM)                                                     | Polybenzimidazole (PBI)                                                             |
|------------------|-----------------------------------------------------------------------------------|------------------------------------------------------------------------------------|-------------------------------------------------------------------------------------|
| Structure [2, 3] | 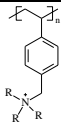 |  |  |

### 3. The charge transfer mechanisms through the three membranes:

|                          | AEM                                              | CEM                                              | PBI                       |
|--------------------------|--------------------------------------------------|--------------------------------------------------|---------------------------|
| In water [4]             | Functional groups                                | Functional groups                                | Ion isolator              |
| In alkaline solution [5] | Functional groups +<br>Alkali-doped free volumes | Functional groups +<br>Alkali-doped free volumes | Alkali-doped free volumes |

## References:

- 1** C. Bianchini, V. Bambagioni, J. Filippi, A. Marchionni, F. Vizza, P. Bert, A. Tampusci, *Electrochem. Commun.* 2009, **11**, 1077-7080.
- 2** G. Couture, A. Alaaeddine, F. Boschet, B. Ameduri, *Progress in Polymer Science* 2011, **36**, 1521-1557.
- 3** J.R. Varcoe, R.C.T. Slade, *Fuel Cells* 2005, **5**, 187-200.
- 4** G. Merle, M. Wessling, K. Nijmeijer, *J. Membr. Sci.* 2011, **377**, 1-35.
- 5** Z. Mai, H. Zhang, X. Li, X. Geng, H. Zhang, *Electrochem. Commun.* 2011, **13**, 1009-1012.
